# Supplementary material for: Silver nanoparticles functionalized with a fluorescent cyclic RGD peptide: a versatile integrin targeting platform for cells and bacteria
Source: Royal Society of Chemistry journal article supplement (doi:10.1039/c6ra21568h), 2016-01-01
Supplement: c6ra21568h1.pdf [file c6ra21568h1.pdf]

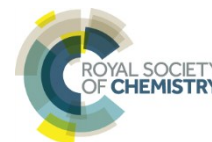

## Electronic Supplementary Information (ESI)

Received 00th January 20xx,  
Accepted 00th January 20xx

DOI: 10.1039/x0xx00000x

[www.rsc.org/](http://www.rsc.org/)

### Silver nanoparticles functionalized with a fluorescent cyclic RGD peptide: a versatile integrin targeting platform for cells and bacteria

P. Di Pietro<sup>a</sup>, L. Zaccaro<sup>b</sup>, D. Comegna<sup>b</sup>, A. Del Gatto<sup>b</sup>, M. Saviano<sup>c</sup>, R. Snyders<sup>d,e</sup>, D. Cossement<sup>e</sup>, C. Satriano<sup>a†</sup> and Enrico Rizzarelli<sup>a,f</sup>

|                                                                                                                                                                                                                                  |   |
|----------------------------------------------------------------------------------------------------------------------------------------------------------------------------------------------------------------------------------|---|
| <b>Figure S1:</b> UV-visible spectra of AgNP and peptide-AgNP upon NaCl addition .....                                                                                                                                           | 2 |
| <b>Figure S2:</b> FT-IR analysis of hybrid AgNP/peptide systems compared to the reference peptides and bare AgNPs .....                                                                                                          | 3 |
| <b>Table S1:</b> Surface atomic composition of bare and peptide-functionalized AgNPs .....                                                                                                                                       | 4 |
| <b>Figure S3:</b> Positive ToF-SIMS spectra of AgNPs, AgNP/FITC-(GC) <sub>2</sub> and AgNP/FITC-RGD(GC) <sub>2</sub> (from the top to the bottom) .....                                                                          | 4 |
| <b>Table S2:</b> Significant peaks (statistical weight >90% for PC1 and >50% for PC2) extracted from PCA analysis of the negative ToF-SIMS spectra of AgNP, AgNP/FITC-RGD(GC) <sub>2</sub> and AgNP/FITC-(GC) <sub>2</sub> ..... | 5 |
| <b>Figure S4:</b> Fluorescence spectra of AgNP/FITC-(GC) <sub>2</sub> (a) and AgNP/FITC-RGD(GC) <sub>2</sub> (b) in the absence or presence of AgNPs .....                                                                       | 6 |

<sup>a</sup> Department of Chemical Sciences, University of Catania, viale Andrea Doria 6, 95125 Catania, Italy and Consorzio Interuniversitario di Ricerca in Chimica dei Metalli nei Sistemi Biologici (C.I.R.C.M.S.B.).

<sup>b</sup> Institute of Biostructure and Bioimaging (IBB) of the Italian National Research Council (CNR), Via Mezzocannone, 16, Napoli, Italy.

<sup>c</sup> Institute of Crystallography (IC) of the Italian National Research Council (CNR), Via Amendola 122/O-70126 Bari.

<sup>d</sup> Chimie des Interactions Plasma Surface (CHIPS), Research Institute for Materials Science and Engineering, Université de Mons (UMONS).

<sup>e</sup> Materia Nova Research Center, 1, Avenue Copernic, 7000 Mons, Belgium.

<sup>f</sup> Institute of Biostructure and Bioimaging (IBB) of the Italian National Research Council (CNR), 18, Via Paolo Gaifami 18, Catania, Italy.

† Corresponding author. E-mail: [csatriano@unict.it](mailto:csatriano@unict.it); tel: +39 0957385136.

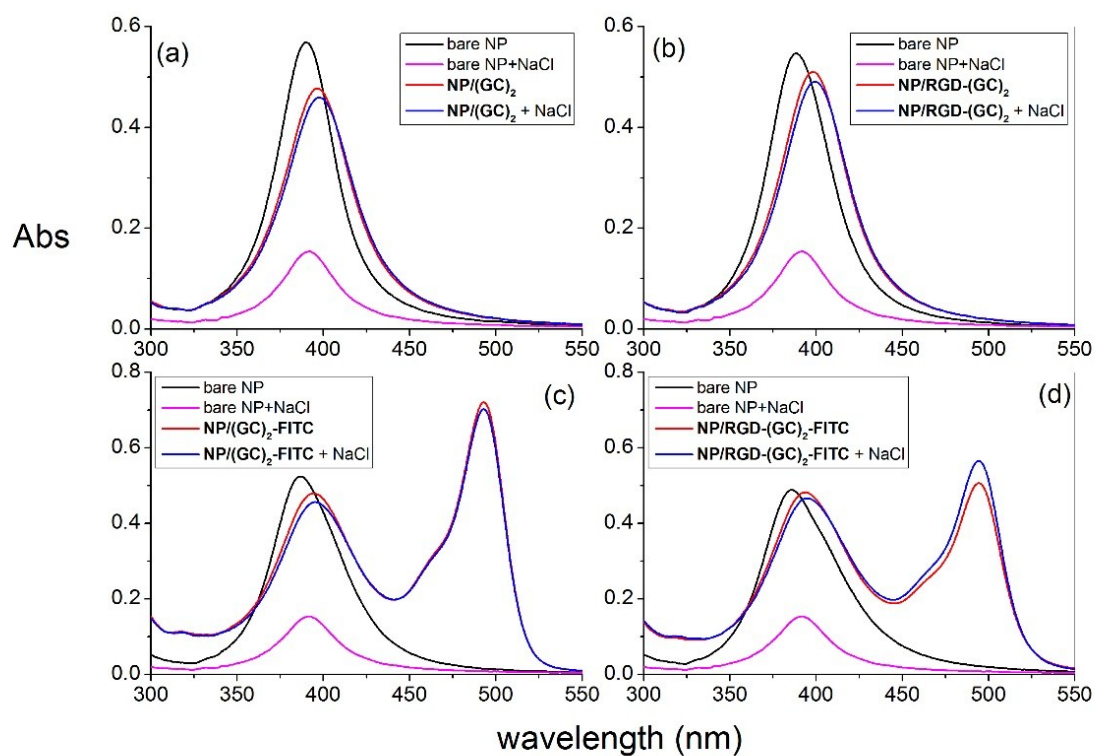

**Figure S1** - UV-visible spectra recorded by addition of NaCl (30 mM) to AgNPs ( $4.6 \times 10^8$  NP/mL) both before (bare NP) and after the peptide addition: (a)  $(GC)_2$  (12  $\mu$ M); (b) RGD $(GC)_2$  (12  $\mu$ M); (c) FITC- $(GC)_2$  (5  $\mu$ M); (d) FITC-RGD $(GC)_2$  (5  $\mu$ M).

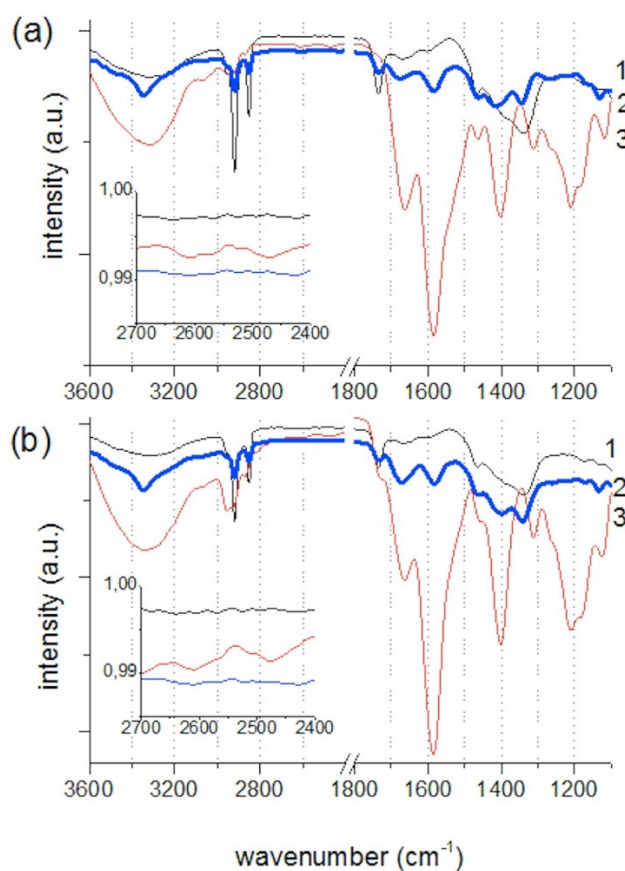

**Figure S2** - Recorded FT-IR spectra of the bare silver colloidal particles (line 1), the unbound peptide (line 3) and the AgNP-peptide systems (line 2) for  $(GC)_2$  (a) and  $RGD(GC)_2$  (b), respectively. In the inset: the magnified 2700-2400  $cm^{-1}$  region.

**Table S1.** Surface atomic composition of bare and peptide-functionalized AgNPs

|                         | C 1s<br>(at. %) | N 1s<br>(at. %) | O 1s<br>(at. %) | S 2p<br>(at. %) | Ag 3d<br>(at. %) |
|-------------------------|-----------------|-----------------|-----------------|-----------------|------------------|
| Bare AgNP               | 74.2            | -               | 23.2            | -               | 2.6              |
| FITC- $(GC)_2$ /AgNP    | 65.4            | 2.2             | 28.4            | 0.8             | 3.2              |
| FITC- $RGD(GC)_2$ /AgNP | 65.1            | 2.6             | 25.3            | 1.0             | 6.1              |

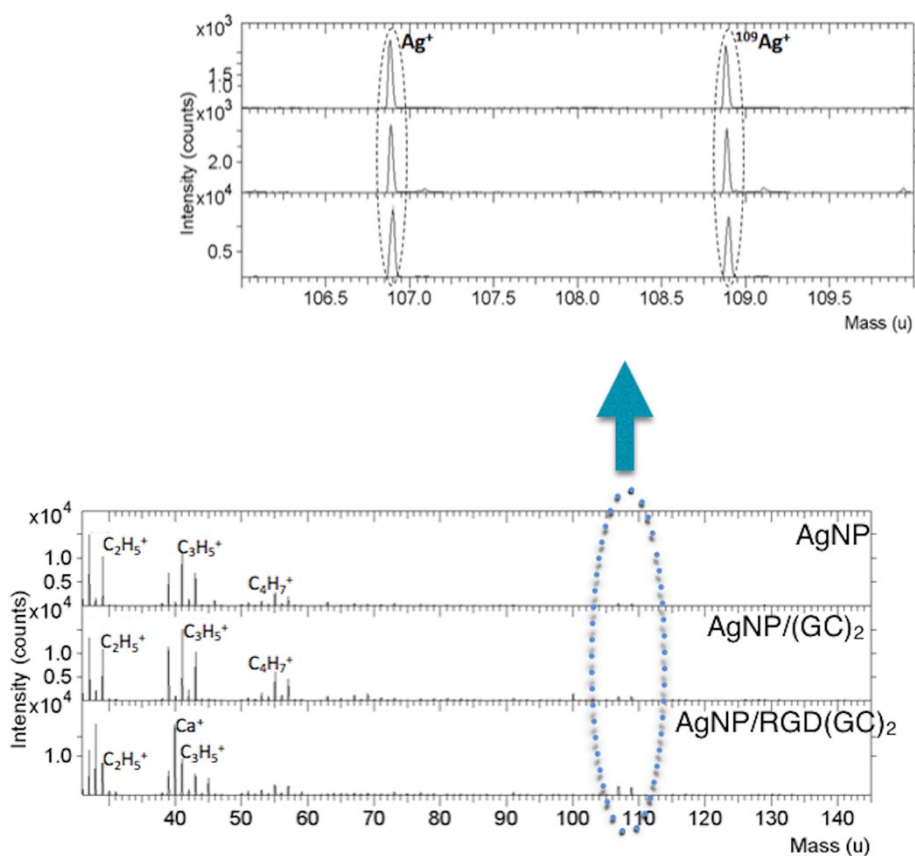

**Figure S3:** Positive ToF-SIMS spectra of AgNPs, AgNP/FITC-(GC)<sub>2</sub> and AgNP/FITC-RGD(GC)<sub>2</sub> (from the top to the bottom)

**Table S2-** Significant peaks (statistical weight >90% for PC1 and >50% for PC2) extracted from PCA analysis of the negative ToF-SIMS spectra of AgNP, AgNP/FITC-RGD(GC)<sub>2</sub> and AgNP/FITC-(GC)<sub>2</sub>.

| Loadings PC1 < 0               | Loadings PC1 > 0 | Loadings PC2 < 0              | Loadings PC2 > 0                             |
|--------------------------------|------------------|-------------------------------|----------------------------------------------|
| CNO <sup>-</sup>               | CH <sup>-</sup>  | CHO <sub>2</sub> <sup>-</sup> | HS <sup>-</sup>                              |
| O <sub>2</sub> <sup>-</sup>    |                  | C <sub>2</sub> H <sup>-</sup> | SO <sup>-</sup>                              |
| AgCl <sub>2</sub> <sup>-</sup> |                  |                               | S <sup>-</sup>                               |
| CN <sup>-</sup>                |                  |                               | C <sub>2</sub> H <sub>3</sub> O <sup>-</sup> |
| CH <sub>4</sub> <sup>-</sup>   |                  |                               |                                              |

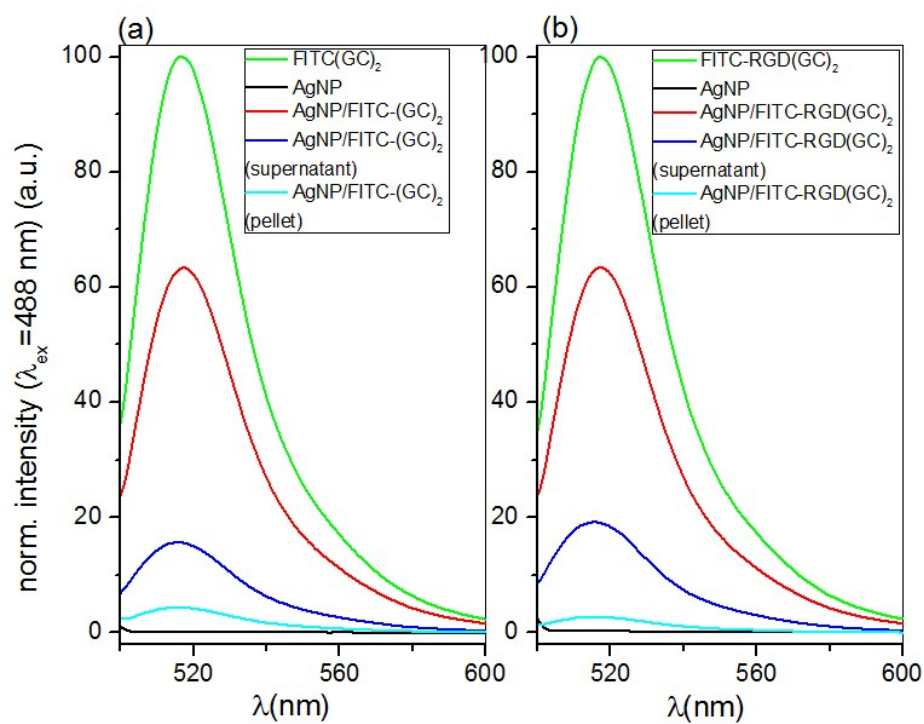

**Figure S4:** Fluorescence spectra (excitation wavelength = 488 nm) of FITC-(GC)<sub>2</sub> (a) and FITC-RGD(GC)<sub>2</sub> (b) both free and in the presence of AgNPs (before and after centrifugation).
